# Supplementary material for: Self-assembly of a dithiocarbamate calix[4]arene on Ag nanoparticles and its application in the fabrication of surface-enhanced Raman scattering based nanosensors
Source: Royal Society of Chemistry journal article supplement (doi:10.1039/b812811a), 2009-01-01
Supplement: b812811a.pdf [file b812811a.pdf]

# Supporting Information

## **Self-Assembly of a dithiocarbamate calix[4]arene on Ag nanoparticles and its application in the fabrication of surface-enhanced Raman scattering based nanosensors**

Luca Guerrini, José V. Garcia-Ramos, Concepción Domingo, Santiago Sanchez-Cortes\*

*Instituto de Estructura de la Materia. CSIC. Serrano, 121. 28006-Madrid. Spain.*

**Table S1.** Experimental IR, Raman and SERS bands ( $\text{cm}^{-1}$ ) and the most probable bands assignment of DTCX.

| <i>Infrared</i><br><i>KBr</i> | <i>Raman</i><br><i>powder</i> | <i>SERS</i><br><i>on AgCT NPs</i> | <i>SERS</i><br><i>on AgHX NPs</i> | <i>Assignment</i>                               |
|-------------------------------|-------------------------------|-----------------------------------|-----------------------------------|-------------------------------------------------|
|                               |                               | 130w                              | 130w                              | Raman scattering by nanostructured Ag           |
|                               |                               | 150w                              | 150w                              |                                                 |
|                               |                               | 165w                              | 165w                              |                                                 |
|                               |                               | 189s                              | 189s                              |                                                 |
|                               |                               |                                   | 245s                              | vAg-Cl                                          |
| 279w                          |                               |                                   |                                   | Skeletal deformations                           |
| 301w                          |                               |                                   |                                   |                                                 |
|                               | 375w                          |                                   |                                   |                                                 |
|                               | 393w                          |                                   |                                   |                                                 |
|                               | 427w                          | 427m                              | 427m                              |                                                 |
| 441m                          |                               |                                   |                                   |                                                 |
| 487vs                         |                               |                                   |                                   | tert-butyl deformation+ $\rho$ CH               |
|                               | 505w                          |                                   |                                   |                                                 |
|                               | 545w                          | 535w                              | 539w                              |                                                 |
| 555m                          |                               |                                   |                                   | Phenyl deformation + $\delta$ COC               |
| 583w                          | 572vs                         | 574s                              | 571s                              |                                                 |
| 634m                          | 638w                          |                                   |                                   |                                                 |
| 678s                          |                               | 667m                              | 664m                              |                                                 |
|                               | 699m                          | 703m                              | 702s                              |                                                 |
|                               | 733w                          |                                   |                                   |                                                 |
| 785m                          |                               |                                   |                                   | $\rho$ CH <sub>3</sub> + $\rho$ CH <sub>2</sub> |
| 807w                          | 810s                          |                                   |                                   |                                                 |
|                               |                               | 845w                              | 849w                              |                                                 |
| 872s                          | 863w                          |                                   |                                   | $\rho_{\text{AR}}\text{CH}$                     |
|                               | 906m                          |                                   |                                   | $\rho\text{CH}_2$                               |
| 918m                          |                               |                                   |                                   | $\rho\text{CH}_2$                               |
|                               |                               | 931m                              | 932m                              | v C-S                                           |

Electronic Supplementary Material for PCCP  
 This Journal is © The Owner Societies

|       |       |        |        |                                                             |
|-------|-------|--------|--------|-------------------------------------------------------------|
| 965s  | 963w  | 966s   | 964vs  | $\nu$ C-S                                                   |
| 1035w | 1027w | 1022vs | 1023s  | $\nu$ C=S                                                   |
|       |       | 1075w  | 1075w  | $\omega$ CH <sub>2</sub> + $\nu$ CO                         |
| 1101m |       |        |        | $\tau$ CH <sub>2</sub>                                      |
| 1127m | 1124s | 1123w  | 1142w  | $\omega$ CH <sub>2</sub>                                    |
|       | 1167w |        |        | $\omega$ CH <sub>2</sub> + $\nu_{AR}$ CO                    |
| 1202s | 1198m | 1200w  | 1195w  | $\omega$ CH <sub>2</sub> + $\nu_{AR}$ CO                    |
|       |       | 1258m  | 1259m  | $\delta$ CSS                                                |
| 1278m |       |        |        | $\delta_{AR}$ CH + $\omega$ CH <sub>2</sub> + $\nu_{AR}$ CO |
| 1303m | 1300m | 1303s  | 1304s  | $\omega$ CH <sub>2</sub>                                    |
| 1348m |       |        |        | $\omega$ CH <sub>2</sub>                                    |
| 1367m |       |        |        | $\delta$ CH+ $\nu_{AR}$ CC                                  |
|       | 1440m | 1441m  | 1440m  | $\delta$ CH                                                 |
| 1466m | 1459m |        |        | $\delta$ CH                                                 |
| 1485s |       |        |        | $\delta$ CH                                                 |
| 1522m |       | 1514m  | 1524m  | $\nu$ C=N <sup>+</sup>                                      |
| 1606w | 1601w | 1601vw | 1602vw | $\nu_{AR}$ C=C                                              |

---

$\nu$ : stretching,  $\delta$ : deformation,  $\omega$ : wagging,  $\tau$ : twisting;  $\rho$ : rocking. AR: aromatic

Intensities: vw, very weak; w, weak; m, medium; s, strong; vs, very strong.
